# Supplementary material
Source: bioRxiv or medRxiv preprint supplement (https://www.medrxiv.org/highwire/filestream/70782/field_highwire_adjunct_files/0/19001719-1.pdf)
Supplement: Supplementary file [file 19001719-1.pdf]

## Online tables and figures

Table S1: BNF Codes (Chapter.Section.Paragraph.Subparagraph), headings and example drugs.

| BNF Codes | Headings                                                        | Example drugs                                        |
|-----------|-----------------------------------------------------------------|------------------------------------------------------|
| 2         | <b>Cardiovascular system</b>                                    |                                                      |
| 2.1       | Positive Inotropic                                              | Digoxin, Enoximone                                   |
| 2.2       | Diuretics                                                       | Bumetanide, furosemide                               |
| 2.2.1     | Thiazides and related diuretics                                 | Bendroflumethiazide,<br>Cyclopenthiazide             |
| 2.3       | Anti-arrhythmic drugs                                           | Adenosine                                            |
| 2.4       | Beta-adrenoceptor blocking drugs                                | Atenolol, Propranolol, Pindolol                      |
| 2.5.5     | Drugs Affecting the renin-angiotensin system                    |                                                      |
| 2.5.5.1   | Angiotensin-converting enzyme inhibitors                        | Captopril, Enalapril maleate,<br>Lisinopril          |
| 2.5.5.2   | Angiotensin-II receptor antagonists                             | Candesartan Cilexetil, Losartan potassium            |
| 2.5.5.3   | Renin Inhibitors                                                | Aliskiren                                            |
| 2.6       | Nitrates, calcium-channel blockers, and other antianginal drugs |                                                      |
| 2.6.1     | Nitrates                                                        | Isosorbide Mononitrate                               |
| 2.6.2     | Calcium-channel blockers                                        | Amlodipine, Felodipine,<br>Nifedipine                |
| 2.6.3     | Other antianginal drugs                                         | Ivabradine                                           |
| 2.6.4     | Peripheral vasodilators and related drugs                       | Cilostazol, Moxisylyte                               |
| 2.9       | Antiplatelet drugs                                              | Asprin, Clopidogrel                                  |
| 2.12      | Lipid-regulating drugs                                          | Pravastatin sodium                                   |
| 4         | <b>Central nervous system</b>                                   |                                                      |
| 4.1       | Hypnotics and anxiolytics                                       | Benzodiazepines                                      |
| 4.2       | Drugs used in psychoses and related disorders                   | Clozapine, Benperidol                                |
| 4.3       | Antidepressant drugs                                            | Selective serotonin re-uptake inhibitors, Tricyclics |
| 6         | <b>Endocrine System</b>                                         |                                                      |
| 6.1.2     | Antidiabetic drugs                                              | Sulfonylureas, Biguanides                            |

Table S2: Descriptive statistics for unmatched cohort 1 members

|                                            | Thiazide diuretics | Beta Blockers | Angiotensin Antagonists | Calcium Channel Blockers | Polytherapy | Other Antiypertensives |
|--------------------------------------------|--------------------|---------------|-------------------------|--------------------------|-------------|------------------------|
| N of observations                          | 13,001             | 15,721        | 28,536                  | 15,996                   | 130,443     | 16,683                 |
| <b>Gender</b>                              | %                  | %             | %                       | %                        | %           | %                      |
| Male                                       | 32.3               | 50.9          | 51.8                    | 49.3                     | 49.1        | 36.0                   |
| Female                                     | 67.7               | 49.1          | 48.2                    | 50.7                     | 50.9        | 64.1                   |
| <b>Survival Events</b>                     |                    |               |                         |                          |             |                        |
| Treatment for depression                   | 26.6               | 25.6          | 26.6                    | 25.0                     | 25.6        | 27.2                   |
| Treatment for Bipolar disorder Yes         | 7.3                | 8.0           | 7.2                     | 7.3                      | 6.6         | 9.7                    |
| Died                                       | 28.4               | 34.9          | 35.3                    | 35.6                     | 32.7        | 52.3                   |
| Changed therapy                            | 47.7               | 36.2          | 39.4                    | 39.1                     | 0.0         | 0.0                    |
| <b>History of hospital treatment</b>       |                    |               |                         |                          |             |                        |
| Cardiovascular disease                     | 8.0                | 41.4          | 27.0                    | 24.0                     | 32.9        | 30.5                   |
| Head Injury                                | 1.4                | 1.5           | 1.6                     | 1.8                      | 1.4         | 1.7                    |
| Substance abuse                            | 0.8                | 1.3           | 1.1                     | 1.4                      | 1.1         | 1.1                    |
| Self-harm                                  | 0.0                | 0.1           | 0.1                     | 0.1                      | 0.0         | 0.1                    |
| <b>History of pharmaceutical treatment</b> |                    |               |                         |                          |             |                        |
| Other Cardiovascular meds                  | 53.8               | 77.8          | 77.0                    | 68.3                     | 79.8        | 69.5                   |
| Diabetic Drugs                             | 4.1                | 5.8           | 18.1                    | 5.4                      | 14.3        | 9.7                    |
| <b>Age</b>                                 |                    |               |                         |                          |             |                        |
| Mean                                       | 76.9               | 76.4          | 76.1                    | 76.8                     | 76.2        | 79.6                   |
| SD                                         | 7.2                | 7.8           | 7.7                     | 7.7                      | 7.0         | 7.8                    |
| <b>SIMD</b>                                |                    |               |                         |                          |             |                        |
| Mean                                       | 5.4                | 5.3           | 5.2                     | 5.2                      | 5.2         | 5.2                    |
| SD                                         | 2.7                | 2.7           | 2.7                     | 2.7                      | 2.7         | 2.7                    |

Table S3: Descriptive statistics for unmatched cohort 2 members

|                                   | Thiazide diuretics           | Beta Blockers | Angiotensin Antagonists | Calcium Channel Blockers | Polytherapy | Other Antihypertensives |
|-----------------------------------|------------------------------|---------------|-------------------------|--------------------------|-------------|-------------------------|
| N of observations                 | 10,125                       | 22,292        | 27,999                  | 15,916                   | 98,283      | 23,717                  |
|                                   | <i>Categorical variables</i> |               |                         |                          |             |                         |
|                                   | %                            | %             | %                       | %                        | %           | %                       |
| <b>Gender</b>                     |                              |               |                         |                          |             |                         |
| Male                              | 20.4                         | 38.5          | 41.8                    | 36.5                     | 40.9        | 29.8                    |
| Female                            | 79.6                         | 61.5          | 58.2                    | 63.5                     | 59.1        | 70.2                    |
| <b>Survival Events</b>            |                              |               |                         |                          |             |                         |
| Treatment for MDD                 | 74.4                         | 73.9          | 73.1                    | 71.7                     | 72.3        | 69.6                    |
| Treatment for Bipolar disorder    | 14.2                         | 16.0          | 14.2                    | 16.2                     | 11.6        | 19.1                    |
| Died                              | 28.8                         | 28.5          | 34.1                    | 37.2                     | 30.3        | 52.5                    |
| Changed therapy                   | 45.1                         | 28.4          | 37.6                    | 35.1                     | 0.0         | 0.0                     |
| <b>History of hospitalization</b> |                              |               |                         |                          |             |                         |
| Cardiovascular                    | 12.4                         | 34.0          | 31.4                    | 33.7                     | 41.1        | 34.2                    |
| Substance Abuse                   | 9.6                          | 18.2          | 15.7                    | 16.9                     | 16.8        | 17.9                    |
| Head injury                       | 2.3                          | 4.4           | 3.8                     | 4.2                      | 3.3         | 3.7                     |
| Self Harm                         | 2.3                          | 5.0           | 3.0                     | 3.3                      | 2.7         | 3.1                     |
| Schizophrenia                     | 1.8                          | 2.4           | 1.9                     | 2.2                      | 1.4         | 2.7                     |
| Major Depressive Disorder         | 6.2                          | 9.6           | 8.0                     | 8.4                      | 6.3         | 9.9                     |
| Bipolar Disorder                  | 1.0                          | 1.6           | 1.3                     | 1.5                      | 0.8         | 1.4                     |
| Other mood disorder               | 1.0                          | 1.7           | 1.4                     | 1.7                      | 1.1         | 1.6                     |
| Personality disorder              | 0.6                          | 1.4           | 0.8                     | 1.1                      | 0.7         | 1.1                     |
| <b>History of prescriptions</b>   |                              |               |                         |                          |             |                         |
| Cardiovascular                    | 53.1                         | 62.2          | 75.5                    | 70.9                     | 81.2        | 66.3                    |
| Diabetic drugs                    | 5.1                          | 6.3           | 20.1                    | 6.7                      | 16.4        | 10.1                    |
| hypnotics                         | 41.4                         | 44.3          | 38.5                    | 42.6                     | 39.2        | 46.0                    |
| Antidepressants                   | 68.1                         | 68.2          | 66.8                    | 65.2                     | 64.4        | 64.7                    |
| Psychoses and related drugs       | 7.2                          | 9.3           | 7.1                     | 8.4                      | 4.8         | 11.4                    |
|                                   | <i>Continuous Variables</i>  |               |                         |                          |             |                         |
| <b>Age</b>                        |                              |               |                         |                          |             |                         |
| Mean                              | 71.5                         | 66.7          | 69.5                    | 71.7                     | 69.9        | 74.2                    |
| SD                                | 10.3                         | 13.1          | 11.3                    | 10.6                     | 10.0        | 11.5                    |
| <b>SIMD</b>                       |                              |               |                         |                          |             |                         |
| Mean                              | 4.9                          | 4.7           | 4.7                     | 4.6                      | 4.7         | 4.8                     |
| SD                                | 2.8                          | 2.8           | 2.7                     | 2.7                      | 2.7         | 2.7                     |

“Other Antihypertensives” were defined on the basis of treatment with a combination of thiazide diuretics, diuretics, BBs, AA and/or CCBs, but not treatment with at least two of these groups within in the last 3 months of the eligible treatment window.

Table S4: Frequency and percentage of the various combination of prescriptions in the “Other Antihypertensives” class

| Other Diuretics | Thiazide diuretics | Beta Blockers | Angiotensin Antagonists | Calcium Channel Blockers | Cohort 1 |       | Cohort 2 |       |
|-----------------|--------------------|---------------|-------------------------|--------------------------|----------|-------|----------|-------|
|                 |                    |               |                         |                          | N.       | %     | N.       | %     |
| 0               | 0                  | 0             | 1                       | 1                        | 4,624    | 11.62 | 1,945    | 5.68  |
| 0               | 0                  | 1             | 0                       | 1                        | 1,482    | 3.72  | 1,293    | 3.77  |
| 0               | 0                  | 1             | 1                       | 0                        | 2,588    | 6.50  | 1,797    | 5.25  |
| 0               | 0                  | 1             | 1                       | 1                        | 315      | 0.79  | 187      | 0.55  |
| 0               | 1                  | 0             | 0                       | 1                        | 1,915    | 4.81  | 679      | 1.98  |
| 0               | 1                  | 0             | 1                       | 0                        | 2,493    | 6.26  | 846      | 2.47  |
| 0               | 1                  | 0             | 1                       | 1                        | 674      | 1.69  | 262      | 0.76  |
| 0               | 1                  | 1             | 0                       | 0                        | 635      | 1.60  | 422      | 1.23  |
| 0               | 1                  | 1             | 0                       | 1                        | 102      | 0.26  | 61       | 0.18  |
| 0               | 1                  | 1             | 1                       | 0                        | 258      | 0.65  | 92       | 0.27  |
| 0               | 1                  | 1             | 1                       | 1                        | 94       | 0.24  | 58       | 0.17  |
| 1               | 0                  | 0             | 0                       | 0                        | 15,652   | 39.33 | 18,870   | 55.09 |
| 1               | 0                  | 0             | 0                       | 1                        | 1,030    | 2.59  | 985      | 2.88  |
| 1               | 0                  | 0             | 1                       | 0                        | 2,583    | 6.49  | 1,986    | 5.80  |
| 1               | 0                  | 0             | 1                       | 1                        | 391      | 0.98  | 220      | 0.64  |
| 1               | 0                  | 1             | 0                       | 0                        | 2,792    | 7.01  | 2,953    | 8.62  |
| 1               | 0                  | 1             | 0                       | 1                        | 155      | 0.39  | 119      | 0.35  |
| 1               | 0                  | 1             | 1                       | 0                        | 427      | 1.07  | 250      | 0.73  |
| 1               | 0                  | 1             | 1                       | 1                        | 67       | 0.17  | 41       | 0.12  |
| 1               | 1                  | 0             | 0                       | 0                        | 833      | 2.09  | 812      | 2.37  |
| 1               | 1                  | 0             | 0                       | 1                        | 139      | 0.35  | 77       | 0.22  |
| 1               | 1                  | 0             | 1                       | 0                        | 270      | 0.68  | 139      | 0.41  |
| 1               | 1                  | 0             | 1                       | 1                        | 89       | 0.22  | 30       | 0.09  |
| 1               | 1                  | 1             | 0                       | 0                        | 110      | 0.28  | 92       | 0.27  |
| 1               | 1                  | 1             | 0                       | 1                        | 21       | 0.05  | 12       | 0.04  |
| 1               | 1                  | 1             | 1                       | 0                        | 39       | 0.10  | 17       | 0.05  |
| 1               | 1                  | 1             | 1                       | 1                        | 23       | 0.06  | 11       | 0.03  |

NB 0 and 1 indicated absence or presence of a particular antihypertensive treatment

Table S5: Sociodemographic and medical event and comorbidity variables that are available for both cohorts

|                                      | Controls | Thiazide diuretics<br>(Thiazide) |          | Beta Blockers (BB) |          | Angiotensin<br>Antagonists<br>(AA) |          | Calcium Channel<br>Blockers<br>(CCBs) |          | Polytherapy<br>(Poly) |          | Other<br>Antihypertensives |          |
|--------------------------------------|----------|----------------------------------|----------|--------------------|----------|------------------------------------|----------|---------------------------------------|----------|-----------------------|----------|----------------------------|----------|
|                                      | Cohort 2 | Cohort 1                         | Cohort 2 | Cohort 1           | Cohort 2 | Cohort 1                           | Cohort 2 | Cohort 1                              | Cohort 2 | Cohort 1              | Cohort 2 | Cohort 1                   | Cohort 2 |
| Total sample size (n)                | 502,937  | 25,555                           | 8,477    | 73,996             | 90,919   | 130,110                            | 48,408   | 57,986                                | 24,634   | 211,282               | 65,584   | 39,801                     | 34,256   |
| <b>Gender</b>                        |          |                                  |          |                    |          |                                    |          |                                       |          |                       |          |                            |          |
| Male (%)                             | 52.8     | 29.8                             | 21.4     | 44.2               | 44.7     | 60.3                               | 46.2     | 53.7                                  | 39.2     | 56.4                  | 48.4     | 40.9                       | 33.7     |
| Female (%)                           | 15.6     | 70.2                             | 78.6     | 55.8               | 15.0     | 39.7                               | 53.8     | 46.3                                  | 60.8     | 43.6                  | 51.6     | 59.1                       | 66.3     |
| <b>Survival events</b>               |          |                                  |          |                    |          |                                    |          |                                       |          |                       |          |                            |          |
| Treatment for depression (%)         | 39.1     | 24.1                             | 72.3     | 25.9               | 79.2     | 19.6                               | 67.8     | 16.8                                  | 65.2     | 22.1                  | 63.6     | 23.4                       | 65.1     |
| Treatment for Bipolar disorder (%)   | 8.0      | 2.7                              | 10.6     | 1.7                | 11.6     | 1.4                                | 8.3      | 2.0                                   | 9.9      | 2.1                   | 7.3      | 4.4                        | 15.5     |
| Died (%)                             | 9.6      | 8.7                              | 12.5     | 5.6                | 4.6      | 5.1                                | 7.2      | 7.1                                   | 9.8      | 8.9                   | 9.4      | 22.1                       | 9.8      |
| Changed Therapy (%)                  | na       | 45.3                             | 39.2     | 19.9               | 10.0     | 33.6                               | 33.6     | 32.0                                  | 28.7     | NA                    | NA       | NA                         | NA       |
| <b>History of hospital treatment</b> |          |                                  |          |                    |          |                                    |          |                                       |          |                       |          |                            |          |
| Cardiovascular disease (%)           | 3.7      | 4.5                              | 9.5      | 13.9               | 8.0      | 7.3                                | 13.2     | 7.5                                   | 13.7     | 21.1                  | 34.4     | 15.6                       | 18.8     |
| Substance Abuse (%)                  | 16.8     | 0.9                              | 12.6     | 1.3                | 18.0     | 1.3                                | 18.8     | 1.4                                   | 19.1     | 1.3                   | 28.2     | 1.5                        | 27.0     |
| Head Injury (%)                      | 5.8      | 1.6                              | 3.6      | 3.0                | 6.1      | 3.1                                | 5.2      | 2.4                                   | 4.7      | 2.3                   | 5.2      | 2.5                        | 5.5      |
| Self-Harm (%)                        | 7.5      | 0.2                              | 4.6      | 0.4                | 11.2     | 0.3                                | 6.2      | 0.3                                   | 6.1      | 0.2                   | 5.6      | 0.3                        | 8.0      |
| <b>History of Prescriptions</b>      |          |                                  |          |                    |          |                                    |          |                                       |          |                       |          |                            |          |
| Other Cardiovascular drugs (%)       | 14.3     | 39.2                             | 40.8     | 39.7               | 21.2     | 45.8                               | 51.1     | 44.3                                  | 49.6     | 60.6                  | 64.3     | 48.3                       | 45.5     |
| Diabetic drugs (%)                   | 2.2      | 3.3                              | 4.6      | 3.2                | 2.6      | 15.4                               | 17.8     | 3.9                                   | 4.9      | 11.1                  | 9.8      | 7.3                        | 7.6      |
| <b>Age</b>                           |          |                                  |          |                    |          |                                    |          |                                       |          |                       |          |                            |          |
| Mean                                 | 52.8     | 64.9                             | 62.2     | 53.4               | 44.7     | 56.3                               | 54.4     | 63.9                                  | 61.2     | 61.2                  | 57.1     | 66.6                       | 62.5     |
| SD                                   | 15.6     | 11.4                             | 14.2     | 16.6               | 15.0     | 12.0                               | 12.6     | 11.9                                  | 13.7     | 11.2                  | 62.5     | 15.5                       | 16.7     |
| <b>SIMD 2016</b>                     |          |                                  |          |                    |          |                                    |          |                                       |          |                       |          |                            |          |
| Mean                                 | 4.8      | 5.8                              | 5.2      | 5.6                | 4.6      | 5.7                                | 4.9      | 5.7                                   | 4.9      | 5.6                   | 4.9      | 5.5                        | 4.7      |
| SD                                   | 2.8      | 2.8                              | 2.8      | 2.8                | 2.8      | 2.8                                | 2.8      | 2.8                                   | 2.8      | 2.8                   | 2.8      | 2.8                        | 2.8      |
| <b>Matched comparators</b>           |          |                                  |          |                    |          |                                    |          |                                       |          |                       |          |                            |          |
| N with One                           | na       | 25,555                           | 2,392    | 73,996             | 6,329    | 130,110                            | 6,818    | 57,986                                | 3,468    | 211,282               | 16,387   | 39,801                     | 6,225    |
| % with One                           | na       | 100.0                            | 28.2     | 100.0              | 7.0      | 100.0                              | 14.1     | 100.0                                 | 14.1     | 100.0                 | 25.0     | 100.0                      | 18.2     |
| N with Two                           | na       |                                  | 6,085    |                    | 84,590   |                                    | 41,590   |                                       | 21,166   |                       | 49,197   |                            | 27,031   |
| % with Two                           | na       |                                  | 71.8     |                    | 93.0     |                                    | 85.9     |                                       | 85.9     |                       | 75.0     |                            | 81.8     |

“Other Antihypertensives” were defined on the basis of treatment with a combination of thiazide diuretics, diuretics, BBs, AA and/or CCBs, but not treatment with at least two of these groups within in the last 3 months of the eligible treatment window.

Table S6: Medical event and comorbidity variables, cohort 2

|                                 | Comparison Group |      | Thiazide diuretics |      | Beta Blockers |      | Angiotensin Antagonists |      | Calcium Channel Blockers |      | Polytherapy |      | Other Antihypertensives |      |
|---------------------------------|------------------|------|--------------------|------|---------------|------|-------------------------|------|--------------------------|------|-------------|------|-------------------------|------|
|                                 | n                | %    | n                  | %    | n             | %    | n                       | %    | n                        | %    | n           | %    | n                       | %    |
| <b>Total</b>                    | 502,937          | 100  | 8,477              | 100  | 90,919        | 100  | 48,408                  | 100  | 24,634                   | 100  | 65,584      | 100  | 34,256                  | 100  |
| <b>Survival events</b>          |                  |      |                    |      |               |      |                         |      |                          |      |             |      |                         |      |
| Treatment for depression        | 196,587          | 39.1 | 6,127              | 72.3 | 72,024        | 79.2 | 32,794                  | 67.8 | 16,054                   | 65.2 | 41,685      | 63.6 | 22,289                  | 65.1 |
| Treatment for Bipolar           | 39,998           | 8.0  | 900                | 10.6 | 10,543        | 11.6 | 4,018                   | 8.3  | 2,445                    | 9.9  | 4,817       | 7.3  | 5,321                   | 15.5 |
| Died                            | 48,313           | 9.6  | 1,055              | 12.5 | 4,154         | 4.6  | 3,494                   | 7.2  | 2,404                    | 9.8  | 6,168       | 9.4  | 26,644                  | 9.8  |
| Changed Therapy                 |                  |      | 3,323              | 39.2 | 9,101         | 10.0 | 16,250                  | 33.6 | 7,065                    | 28.7 |             |      |                         |      |
| <b>History of hospital</b>      |                  |      |                    |      |               |      |                         |      |                          |      |             |      |                         |      |
| Cardiovascular disease          | 18,452           | 3.7  | 801                | 9.5  | 7,245         | 8.0  | 6,368                   | 13.2 | 3,380                    | 13.7 | 22,541      | 34.4 | 6,435                   | 18.8 |
| Substance Abuse                 | 84,585           | 16.8 | 1,068              | 12.6 | 16,402        | 18.0 | 9,116                   | 18.8 | 4,694                    | 19.1 | 18,479      | 28.2 | 9,264                   | 27.0 |
| Head Injury                     | 29,036           | 5.8  | 303                | 3.6  | 5,552         | 6.1  | 2,517                   | 5.2  | 1,167                    | 4.7  | 3,403       | 5.2  | 1,870                   | 5.5  |
| Self-harm                       | 37,894           | 7.5  | 389                | 4.6  | 10,182        | 11.2 | 3,016                   | 6.2  | 1,491                    | 6.1  | 3,692       | 5.6  | 2,738                   | 8.0  |
| Schizophrenia                   | 14,363           | 2.9  | 176                | 2.1  | 1,981         | 2.2  | 1,172                   | 2.4  | 582                      | 2.4  | 1,069       | 1.6  | 1,035                   | 3.0  |
| Major Depressive Disorder       | 34,607           | 6.9  | 594                | 7.0  | 8,542         | 9.4  | 3,760                   | 7.8  | 2,039                    | 8.3  | 4,686       | 7.2  | 3,762                   | 11.0 |
| Bipolar Disorder                | 6,708            | 1.3  | 95                 | 1.1  | 1,042         | 1.2  | 626                     | 1.3  | 358                      | 1.5  | 566         | 0.9  | 652                     | 1.9  |
| Other mood disorder             | 4,868            | 1.0  | 112                | 1.3  | 880           | 1.0  | 457                     | 0.9  | 321                      | 1.3  | 509         | 0.8  | 516                     | 1.5  |
| Personality disorder            | 7,019            | 1.4  | 94                 | 1.1  | 1,847         | 2.0  | 620                     | 1.3  | 342                      | 1.4  | 761         | 1.2  | 744                     | 2.2  |
| <b>History of Prescriptions</b> |                  |      |                    |      |               |      |                         |      |                          |      |             |      |                         |      |
| Other Cardiovascular drugs      | 71,980           | 14.3 | 3,455              | 40.8 | 19,286        | 21.2 | 24,738                  | 51.1 | 12,206                   | 49.6 | 42,175      | 64.3 | 15,581                  | 45.5 |
| Diabetic drugs                  | 10,920           | 2.2  | 387                | 4.6  | 2,366         | 2.6  | 8,608                   | 17.8 | 1,217                    | 4.9  | 6,405       | 9.8  | 2,588                   | 7.6  |
| Hypnotics and anxiolytics       | 220,526          | 43.9 | 3,805              | 44.9 | 50,315        | 55.3 | 20,721                  | 42.8 | 11,641                   | 47.3 | 26,868      | 41.0 | 18,279                  | 53.4 |
| Antidepressant Drugs            | 347,152          | 69.0 | 6,370              | 75.1 | 76,640        | 84.3 | 35,738                  | 73.8 | 18,444                   | 74.9 | 42,813      | 65.3 | 24,591                  | 71.8 |
| Psychoses and related           | 40,190           | 8.0  | 591                | 7.0  | 8,081         | 8.9  | 3,251                   | 6.7  | 1,940                    | 7.9  | 3,091       | 4.7  | 4,112                   | 12.0 |

“Other Antihypertensives” were defined on the basis of treatment with a combination of thiazide diuretics, diuretics, BBs, AA and/or CCBs, but not treatment with at least two of these groups within in the last 3 months of the eligible treatment window.

Table S7: Number at risk at start of year, and number of first new onset of Major depressive disorder and Bipolar disorder

|                                  | Year 1<br>N at Risk (N Failures) | Year 2<br>N at Risk (N Failures) | Year 3<br>N at Risk (N Failures) | Year 4<br>N at Risk (N Failures) | Year 5<br>N at Risk (N Failures) | Year 6<br>N at Risk (N Failures) | Year 7<br>N at Risk (N Failures) |
|----------------------------------|----------------------------------|----------------------------------|----------------------------------|----------------------------------|----------------------------------|----------------------------------|----------------------------------|
| <b>Cohort 1</b>                  |                                  |                                  |                                  |                                  |                                  |                                  |                                  |
| <b>Major Depressive Disorder</b> |                                  |                                  |                                  |                                  |                                  |                                  |                                  |
| Comparison                       | 538730 (23057)                   | 469614 (18799)                   | 405964 (15074)                   | 348452 (12655)                   | 295710 (11032)                   | 246646 (7756)                    | 202096 (5667)                    |
| Thiazide Diuretics               | 25555 (1297)                     | 19930 (957)                      | 15961 (698)                      | 12725 (524)                      | 10143 (421)                      | 7854 (285)                       | 5797 (204)                       |
| Beta Blockers                    | 73996 (6619)                     | 55273 (3655)                     | 42852 (2464)                     | 33293 (1740)                     | 25418 (1285)                     | 18904 (755)                      | 13763 (477)                      |
| Angiotensin Antagonists          | 130110 (5909)                    | 98380 (4156)                     | 77952 (2999)                     | 61780 (2313)                     | 48515 (1829)                     | 37245 (1214)                     | 27673 (802)                      |
| Calcium Channel Blockers         | 57986 (2496)                     | 40413 (1716)                     | 29628 (1129)                     | 21775 (786)                      | 15811 (618)                      | 11172 (372)                      | 7822 (230)                       |
| Poltherapy                       | 211282 (10860)                   | 188908 (8799)                    | 168167 (7177)                    | 149290 (6138)                    | 131551 (5716)                    | 114360 (4566)                    | 98269 (3448)                     |
| Other Antihypertensives          | 39801 (2855)                     | 31517 (2050)                     | 25094 (1438)                     | 19962 (1147)                     | 15645 (876)                      | 12004 (589)                      | 8829 (356)                       |
| <b>Bipolar Disorder</b>          |                                  |                                  |                                  |                                  |                                  |                                  |                                  |
| Comparison                       | 538730 (2251)                    | 489992 (2159)                    | 440705 (1949)                    | 392433 (1685)                    | 345094 (1554)                    | 298844 (1224)                    | 252665 (883)                     |
| Thiazide Diuretics               | 2555 (74)                        | 21007 (84)                       | 17658 (73)                       | 14701 (76)                       | 12162 (75)                       | 9772 (44)                        | 7462 (46)                        |
| Beta Blockers                    | 73996 (213)                      | 61040 (212)                      | 50672 (157)                      | 41528 (159)                      | 33248 (131)                      | 25791 (102)                      | 19192 (59)                       |
| Angiotensin Antagonists          | 130110 (198)                     | 103316 (248)                     | 85318 (219)                      | 70153 (180)                      | 57039 (165)                      | 45252 (149)                      | 34695 (95)                       |
| Calcium Channel Blockers         | 57986 (166)                      | 42408 (157)                      | 32547 (158)                      | 24803 (119)                      | 18640 (94)                       | 13684 (79)                       | 9911 (55)                        |
| Poltherapy                       | 211282 (456)                     | 198948 (556)                     | 185439 (600)                     | 171613 (647)                     | 157346 (728)                     | 142594 (695)                     | 127244 (630)                     |
| Other Antihypertensives          | 39801 (432)                      | 33924 (375)                      | 28839 (307)                      | 24304 (217)                      | 20179 (175)                      | 16380 (142)                      | 12710 (79)                       |
| <b>Cohort 2</b>                  |                                  |                                  |                                  |                                  |                                  |                                  |                                  |
| <b>Major Depressive Disorder</b> |                                  |                                  |                                  |                                  |                                  |                                  |                                  |
| Comparison                       | 502937 (166159)                  | 275860 (11728)                   | 218451 (7164)                    | 170967 (4726)                    | 129132 (3440)                    | 91605 (2078)                     | 58853 (1169)                     |
| Thiazide Diuretics               | 8477 (4966)                      | 2597 (296)                       | 1805 (176)                       | 1253 (110)                       | 836 (75)                         | 545 (33)                         | 322 (18)                         |
| Beta Blockers                    | 90919 (63722)                    | 20930 (3537)                     | 13601 (1739)                     | 9026 (951)                       | 5969 (585)                       | 3719 (292)                       | 2150 (123)                       |
| Angiotensin Antagonists          | 48408 (26766)                    | 15301 (1802)                     | 10270 (894)                      | 6975 (548)                       | 4628 (343)                       | 2960 (167)                       | 1693 (77)                        |
| Calcium Channel Blockers         | 24634 (13459)                    | 7286 (806)                       | 4621 (413)                       | 2865 (223)                       | 1668 (137)                       | 935 (55)                         | 498 (25)                         |
| Poltherapy                       | 65584 (33393)                    | 28086 (3198)                     | 21291 (1967)                     | 16279 (1358)                     | 11977 (920)                      | 8413 (521)                       | 5561 (322)                       |
| Other Antihypertensives          | 34256 (19109)                    | 11063 (1417)                     | 7350 (789)                       | 4912 (458)                       | 3204 (276)                       | 1966 (144)                       | 1094 (68)                        |
| <b>Bipolar Disorder</b>          |                                  |                                  |                                  |                                  |                                  |                                  |                                  |
| Comparison                       | 502937 (31457)                   | 388591 (3252)                    | 317545 (1934)                    | 254160 (1365)                    | 195952 (948)                     | 142943 (563)                     | 95775 (330)                      |
| Thiazide Diuretics               | 9477 (541)                       | 6198 (76)                        | 4905 (59)                        | 3881 (47)                        | 2952 (42)                        | 2147 (25)                        | 1393 (6)                         |
| Beta Blockers                    | 90919 (7064)                     | 68267 (1156)                     | 53520 (796)                      | 41064 (506)                      | 30536 (374)                      | 21133 (208)                      | 13526 (128)                      |
| Angiotensin Antagonists          | 48408 (2794)                     | 33754 (287)                      | 25648 (207)                      | 19083 (154)                      | 13817 (91)                       | 9561 (64)                        | 6150 (27)                        |
| Calcium Channel Blockers         | 24634 (1686)                     | 15998 (199)                      | 11484 (135)                      | 7937 (78)                        | 5267 (51)                        | 3372 (39)                        | 2010 (20)                        |
| Poltherapy                       | 65584 (2889)                     | 55916 (539)                      | 48307 (385)                      | 41137 (333)                      | 34066 (288)                      | 27117 (228)                      | 20662 (145)                      |
| Other Antihypertensives          | 34256 (3822)                     | 24054 (557)                      | 18742 (360)                      | 14474 (239)                      | 10787 (176)                      | 7660 (91)                        | 4904 (41)                        |

“Other Antihypertensives” were defined on the basis of treatment with a combination of thiazide diuretics, diuretics, BBs, AA and/or CCBs, but not treatment with at least two of these groups within in the last 3 months of the eligible treatment window.

Figure S1. Flow chart for derivation of cohort 1 sample

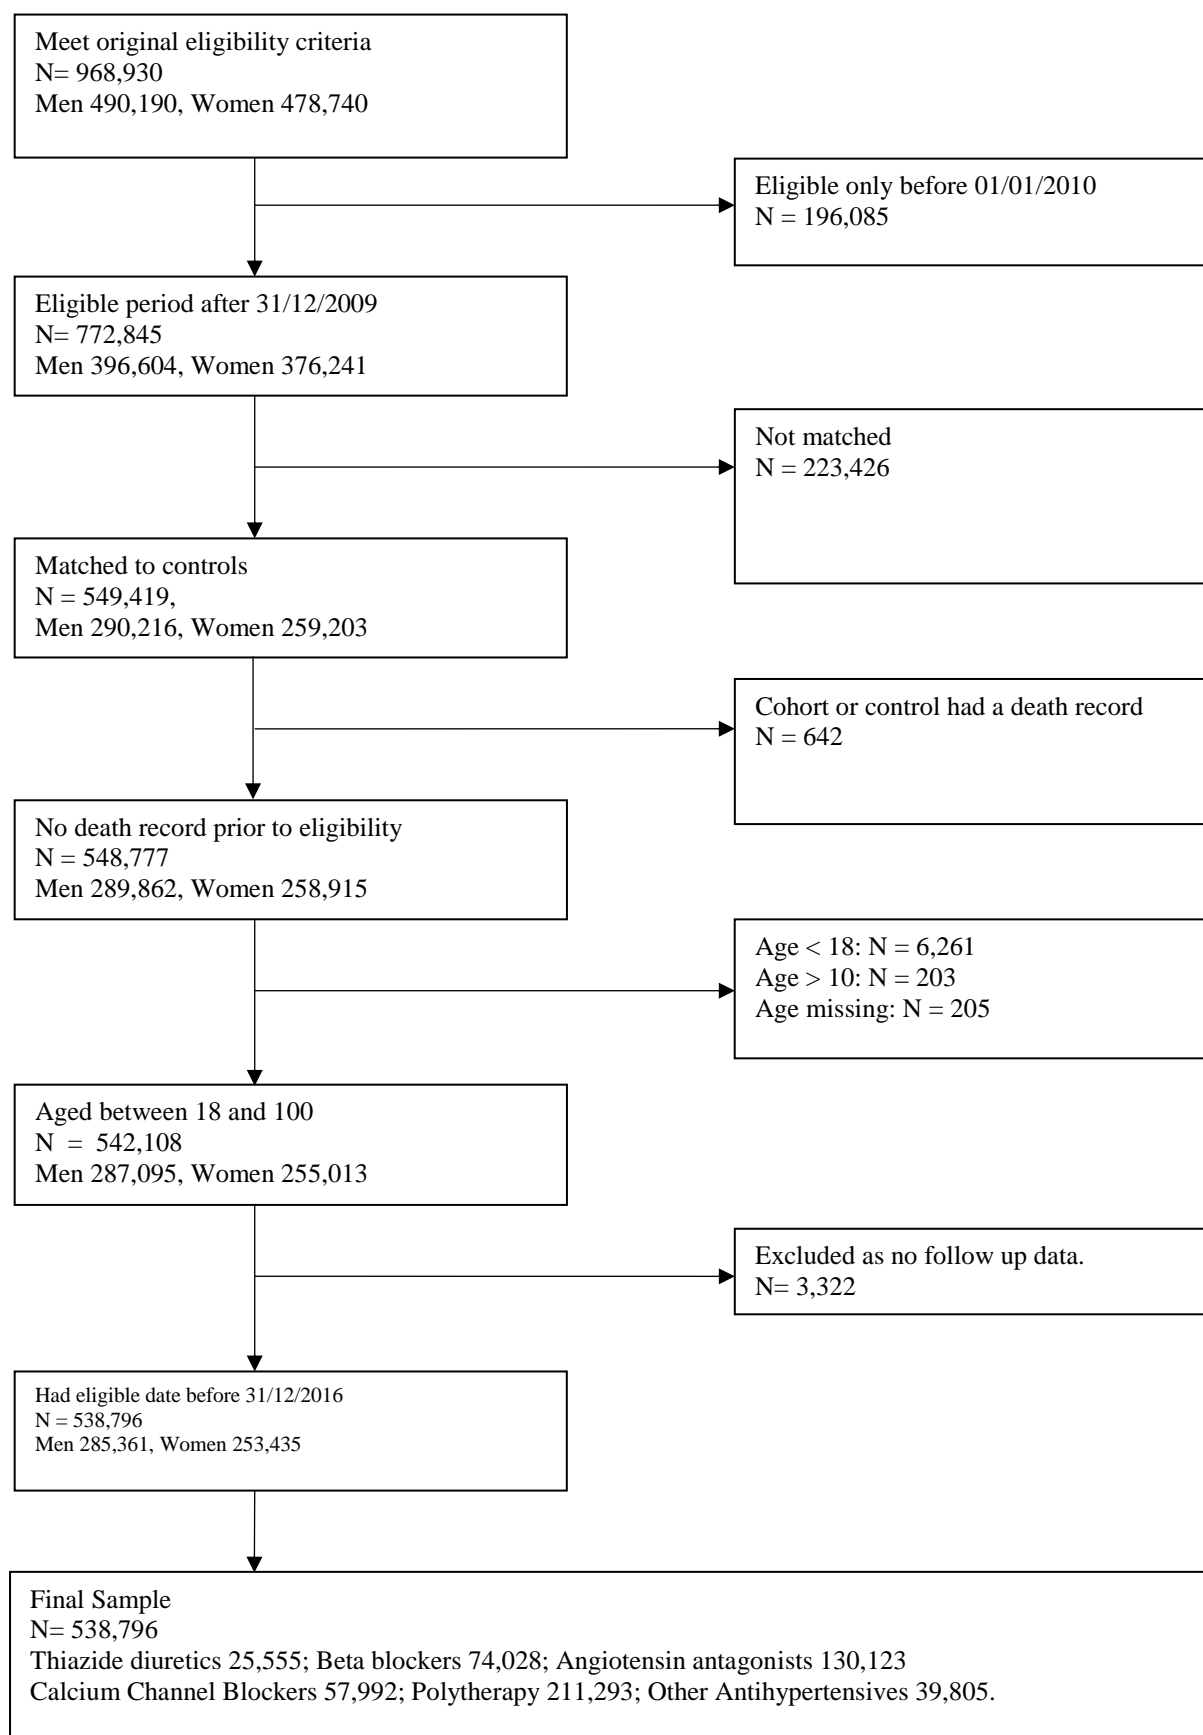



Figure S2: Flow chart for derivation of cohort 2 sample

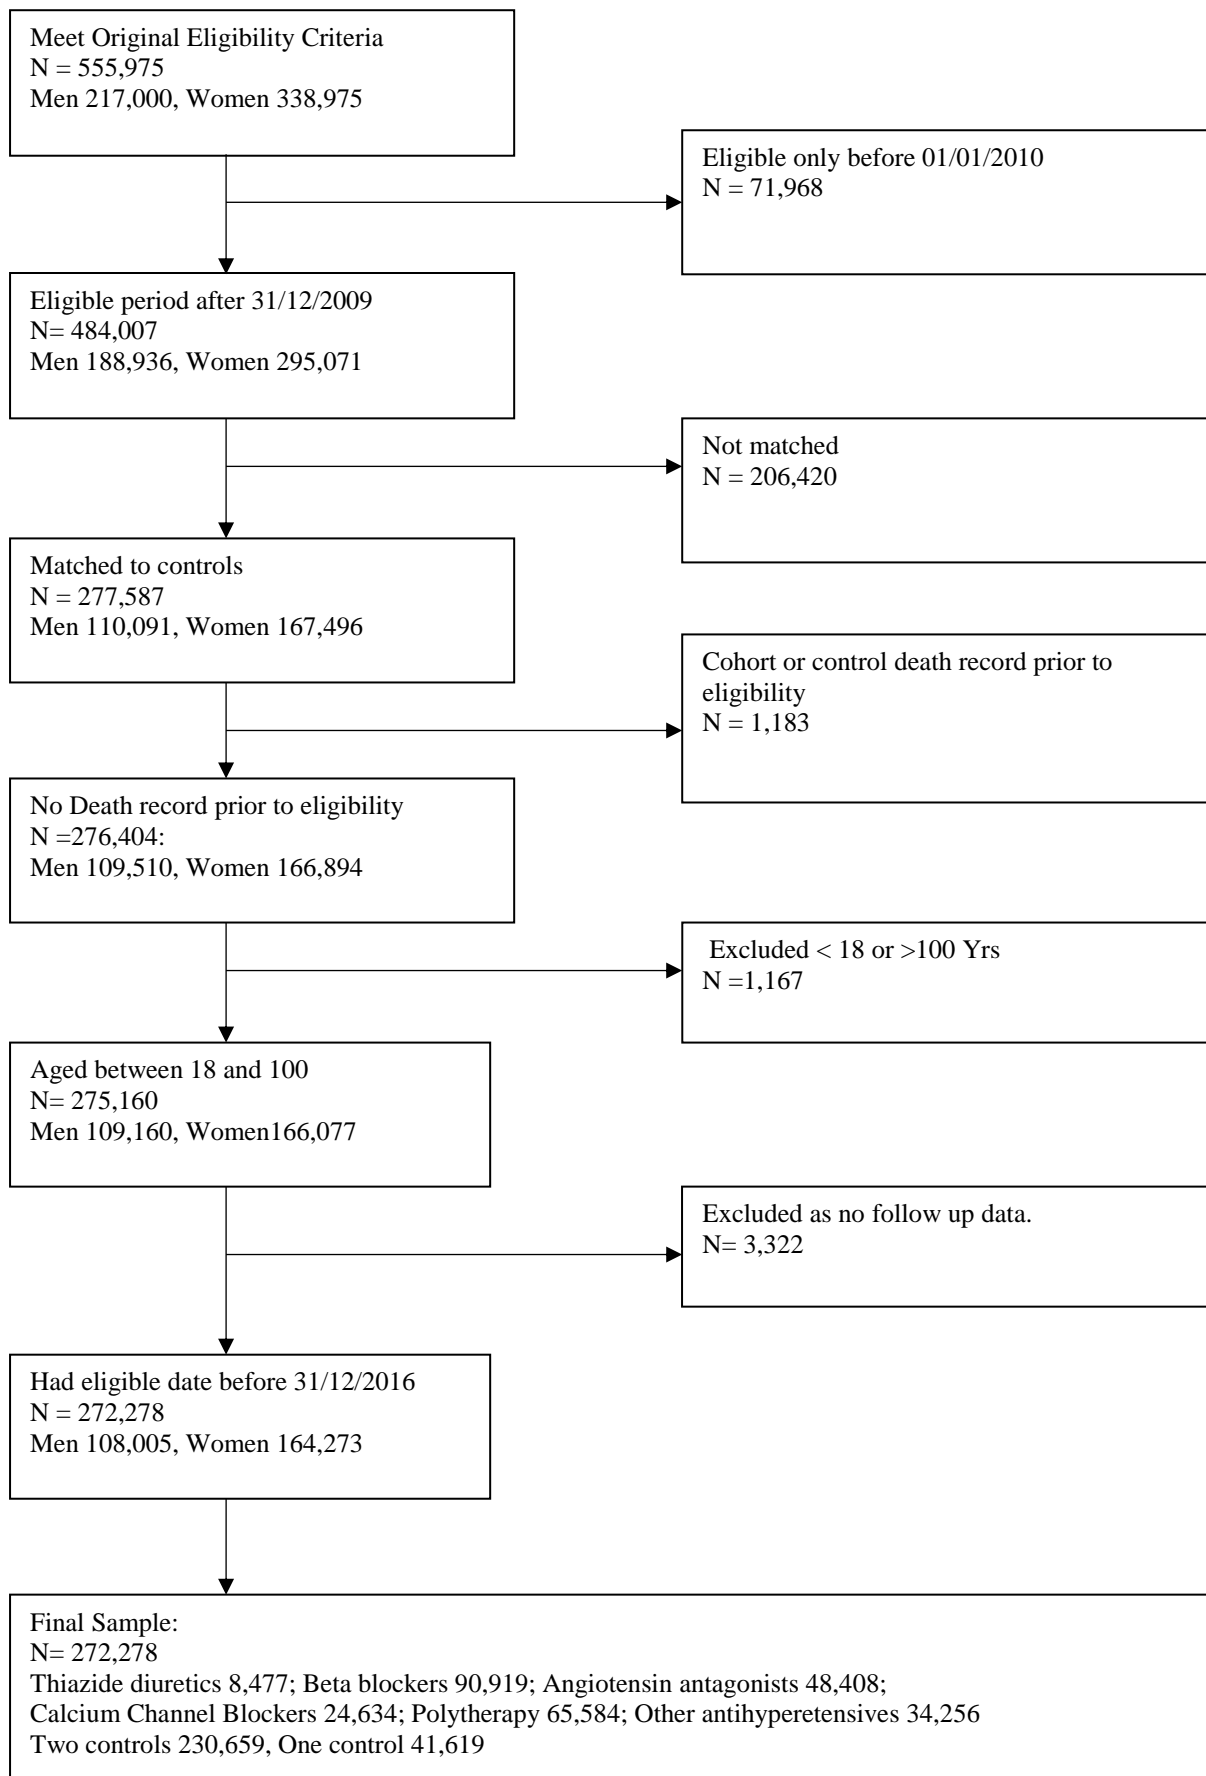

Figure S3: First onset of mood disorders, as indicated by receipt of prescriptions or admission to hospital, by therapy class (people with mental illness).

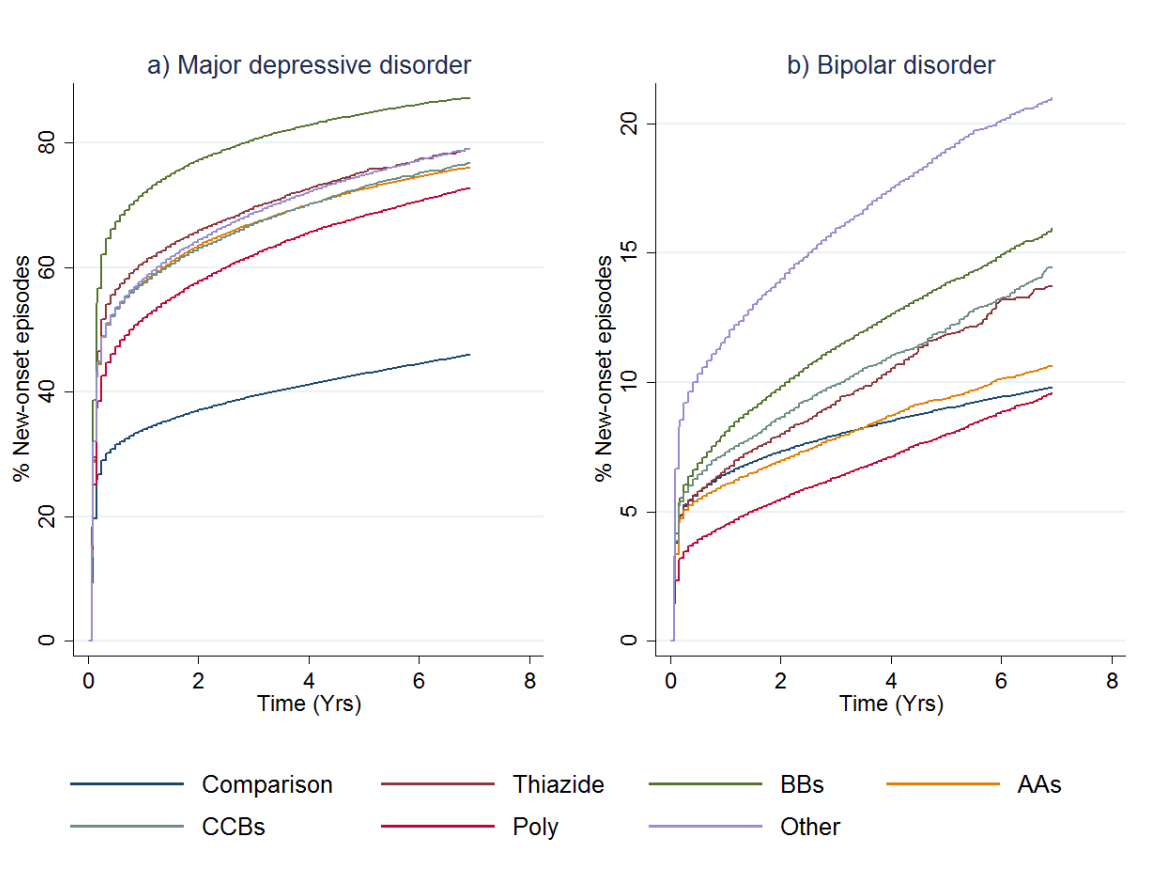

AA – Angiotensin Antagonists, BB – Beta Blockers, CCB – Calcium Channel Blockers

Figure S3 shows cumulative distributions functions for major depressive disorder (panel a) and bipolar disorder (panel b) by therapy class for people with a history of treatment for mental illness (cohort 2). “Other Antihypertensives” were defined on the basis of treatment with a combination of thiazide diuretics, diuretics, BBs, AA and/or CCBs, but not treatment with at least two of these groups within in the last 3 months of the eligible treatment window.

Figure S4: Hazard ratios for new onset depression, as indicated by receipt of prescriptions or admission to hospital, by therapy class (men without mental illness).

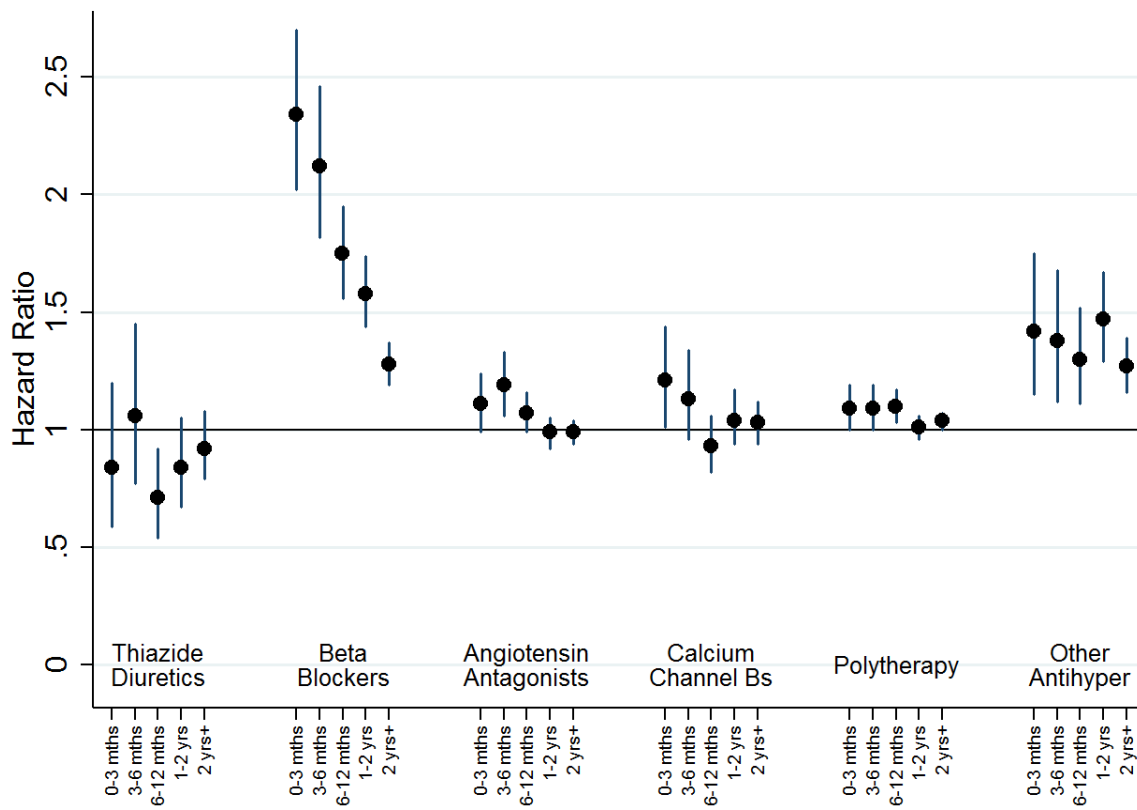

Figure S4 shows hazard ratios for new onset depression by therapy class for men without a history of treatment for mental illness (Cohort 1). Adjustment was carried out for hospital treatment for cardiovascular disease, substance abuse, head injury, self-harm, and pharmaceutical treatment for other cardiovascular drugs and diabetic drugs. “Other Antihypertensives” were defined on the basis of treatment with a combination of thiazide diuretics, diuretics, BBs, AA and/or CCBs, but not treatment with at least two of these groups within in the last 3 months of the eligible treatment window.

Figure S5: Hazard ratios for new onset depression, as indicated by receipt of prescriptions or admission to hospital, by therapy class (women without mental illness).

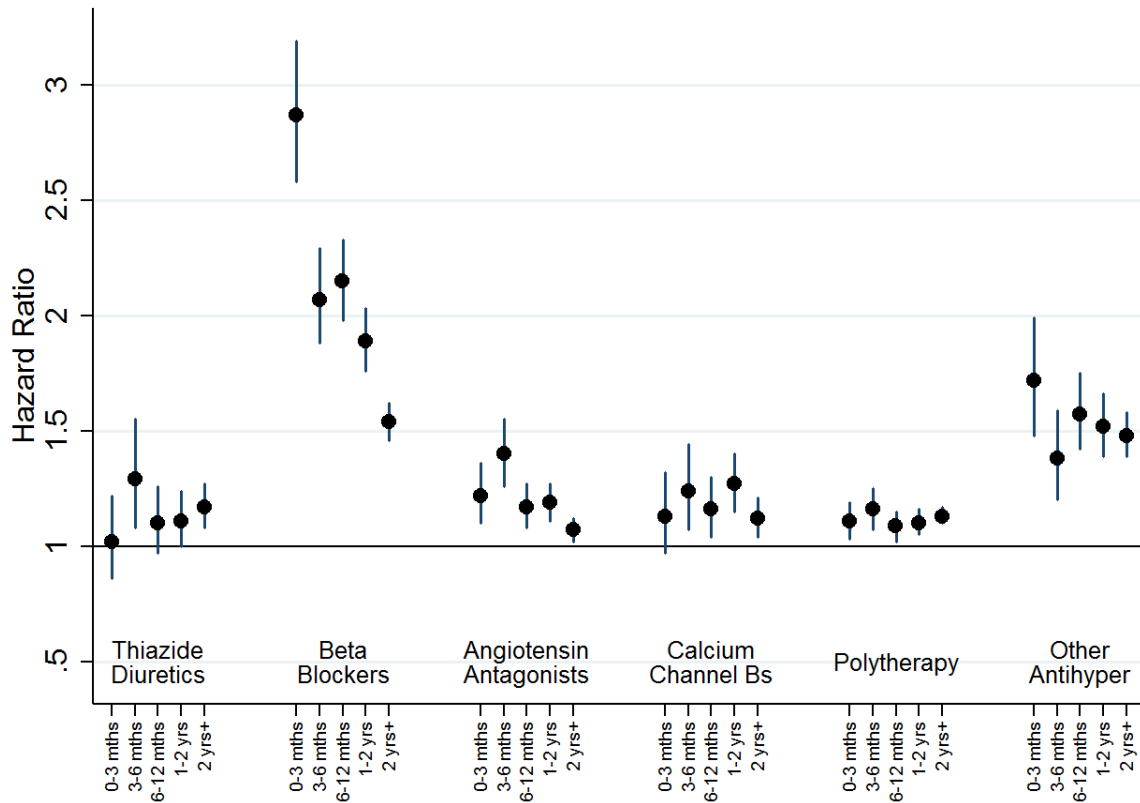

Figure S5 shows hazard ratios for new onset depression by therapy class for women without a history of treatment for mental illness (Cohort 1). Adjustment was carried out for hospital treatment for cardiovascular disease, substance abuse, head injury, self-harm, and pharmaceutical treatment for other cardiovascular drugs and diabetic drugs. “Other Antihypertensives” were defined on the basis of treatment with a combination of thiazide diuretics, diuretics, BBs, AA and/or CCBs, but not treatment with at least two of these groups within in the last 3 months of the eligible treatment window.

Figure S6: Hazard ratios for new onset depression, as indicated by receipt of prescriptions or admission to hospital, by therapy class (people with mental illness).

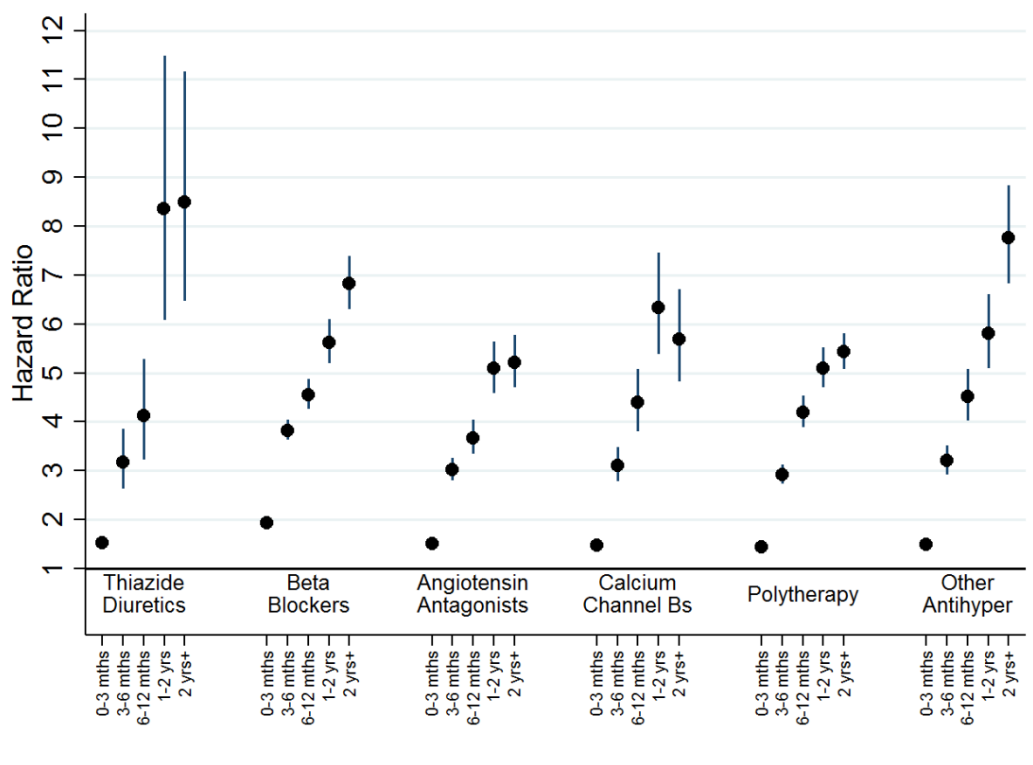

Figure S6: shows hazard ratios for new onset depression by therapy class for people without a history of treatment for mental illness (Cohort 2). Adjustment was carried out for hospital treatment for cardiovascular disease, substance abuse, head injury, self-harm, schizophrenia, major depressive disorder, bipolar disorder, other mood disorders and personality disorder, and pharmaceutical treatment for other cardiovascular drugs, diabetic drugs, hypnotics and anxiolytics, antidepressant drugs, psychoses and related disorders. “Other Antihypertensives” were defined on the basis of treatment with a combination of thiazide diuretics, diuretics, BBs, AA and/or CCBs, but not treatment with at least two of these groups within in the last 3 months of the eligible treatment window.

Figure S7: Hazard ratios for new onset bipolar disorder, as indicated by receipt of prescriptions or admission to hospital, by therapy class (men without mental illness).

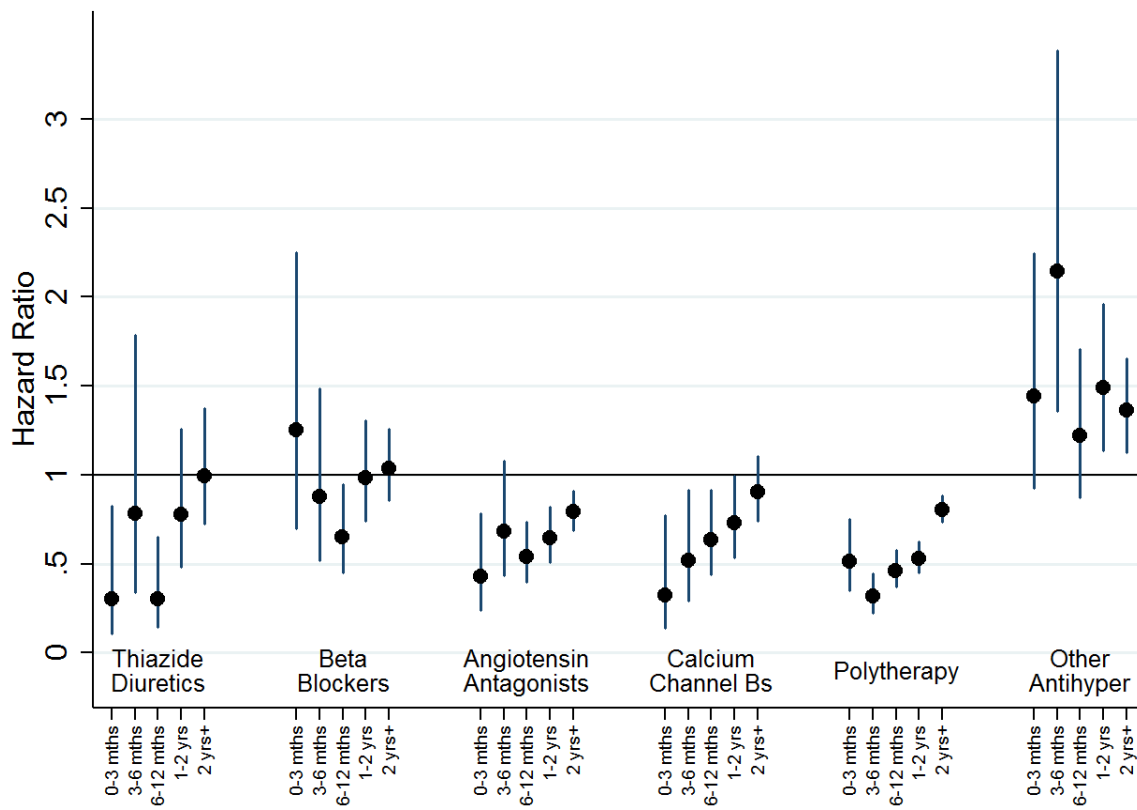

Figure S7 shows hazard ratios for new onset depression by therapy class for men without a history of treatment for mental illness (Cohort 1). Adjustment was carried out for hospital treatment for cardiovascular disease, substance abuse, head injury, self-harm, and pharmaceutical treatment for other cardiovascular drugs and diabetic drugs. “Other Antihypertensives” were defined on the basis of treatment with a combination of thiazide diuretics, diuretics, BBs, AA and/or CCBs, but not treatment with at least two of these groups within in the last 3 months of the eligible treatment window.

Figure S8: Hazard ratios for new onset bipolar disorder, as indicated by receipt of prescriptions or admission to hospital, by therapy class (women without mental illness).

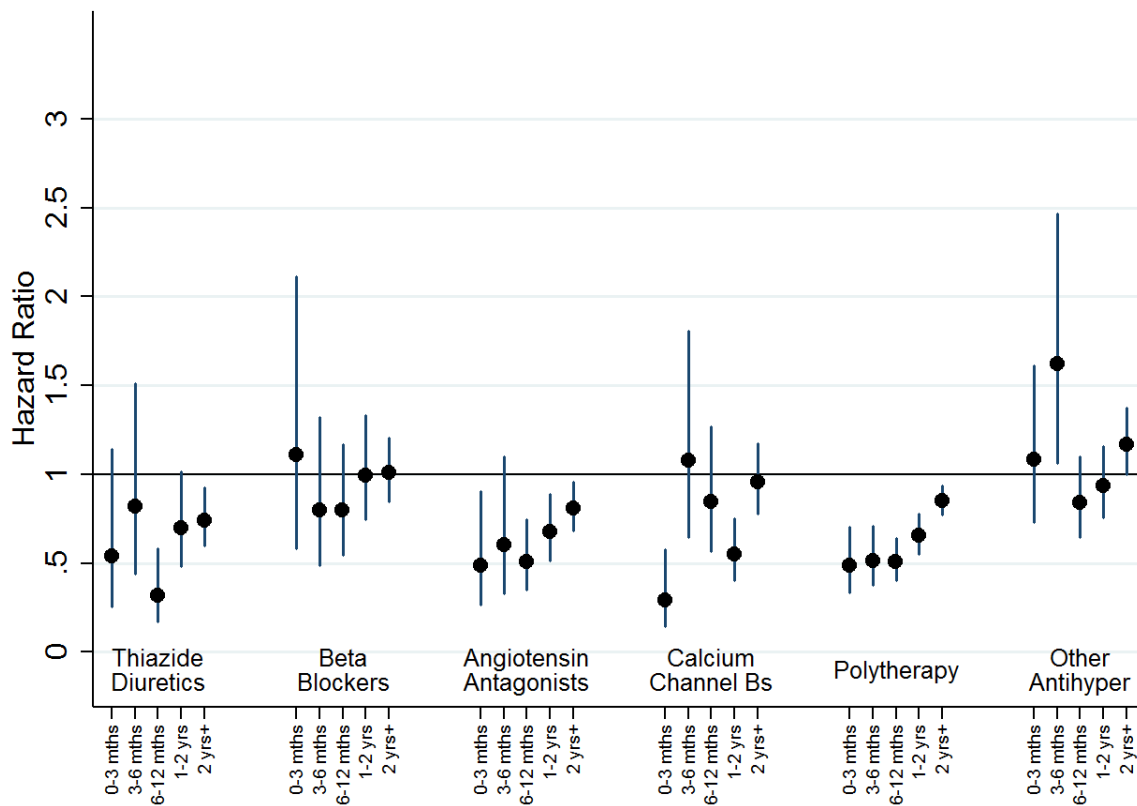

Figure S8 shows hazard ratios for new onset depression by therapy class for women without a history of treatment for mental illness (Cohort 1). Adjustment was carried out for hospital treatment for cardiovascular disease, substance abuse, head injury, self-harm, and pharmaceutical treatment for other cardiovascular drugs and diabetic drugs. “Other Antihypertensives” were defined on the basis of treatment with a combination of thiazide diuretics, diuretics, BBs, AA and/or CCBs, but not treatment with at least two of these groups within in the last 3 months of the eligible treatment window.

Figure S9: Hazard ratios for new onset bipolar disorder, as indicated by receipt of prescriptions or admission to hospital, by therapy class (people with mental illness).

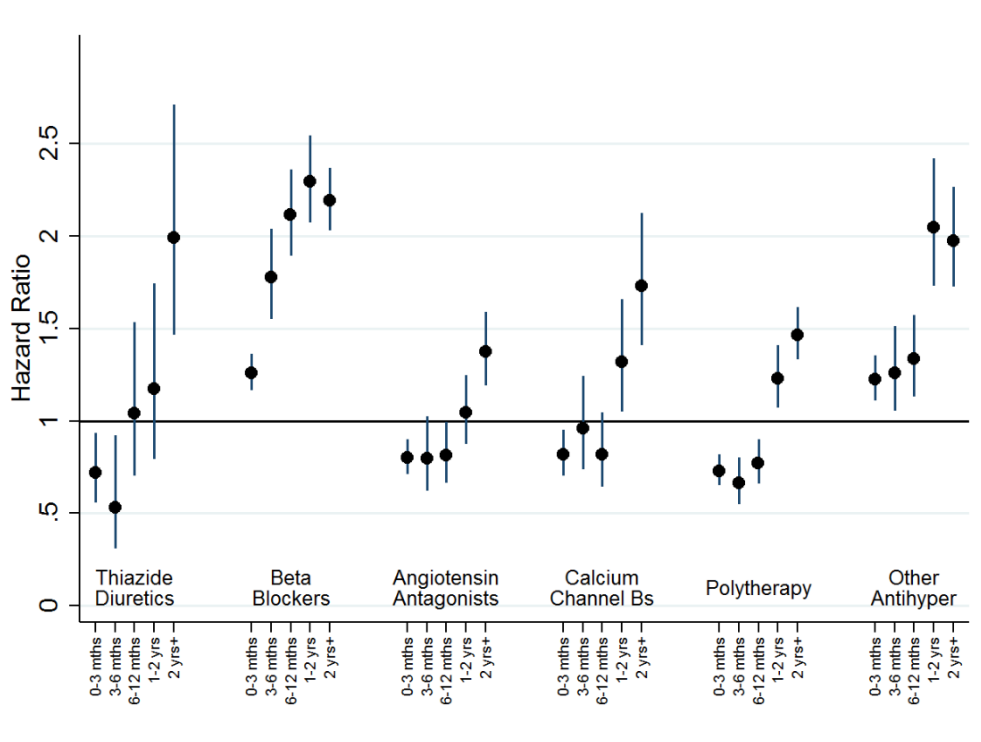

Figure S9 shows hazard ratios for new onset depression by therapy class for people without a history of treatment for mental illness (Cohort 2). Adjustment was carried out for hospital treatment for cardiovascular disease, substance abuse, head injury, self-harm, schizophrenia, major depressive disorder, bipolar disorder, other mood disorders and personality disorder, and pharmaceutical treatment for other cardiovascular drugs, diabetic drugs, hypnotics and anxiolytics, antidepressant drugs, psychoses and related disorders. “Other Antihypertensives” were defined on the basis of treatment with a combination of thiazide diuretics, diuretics, BBs, AA and/or CCBs, but not treatment with at least two of these groups within in the last 3 months of the eligible treatment window.
